# Supplementary material for: Pre-Clinical Evaluation of the Proteasome Inhibitor Ixazomib against Bortezomib-Resistant Leukemia Cells and Primary Acute Leukemia Cells
Source: MDPI journal article supplement (doi:10.3390/cells10030665), 2021-03-17
Supplement: s1 [file s1]

## Supplementary Materials

**FIGURE S1: IXA vs BTZ inhibition profile of proteasome subunit activity in CEM (ALL) cells and their low/high BTZ-resistant sublines.**  $\beta 5$ ,  $\beta 5i$ ,  $\beta 1$ , and  $\beta 1i$ -associated catalytic activity in cell extracts of CEM/WT, CEM/BTZ7 (low level BTZ resistance), and CEM/BTZ/BTZ200 (high level BTZ resistance) was assessed in the absence (control) or presence of increasing concentrations IXA or BTZ. Results depicted represent the absolute mean of the slopes  $\pm$  SD of three separate experiments.

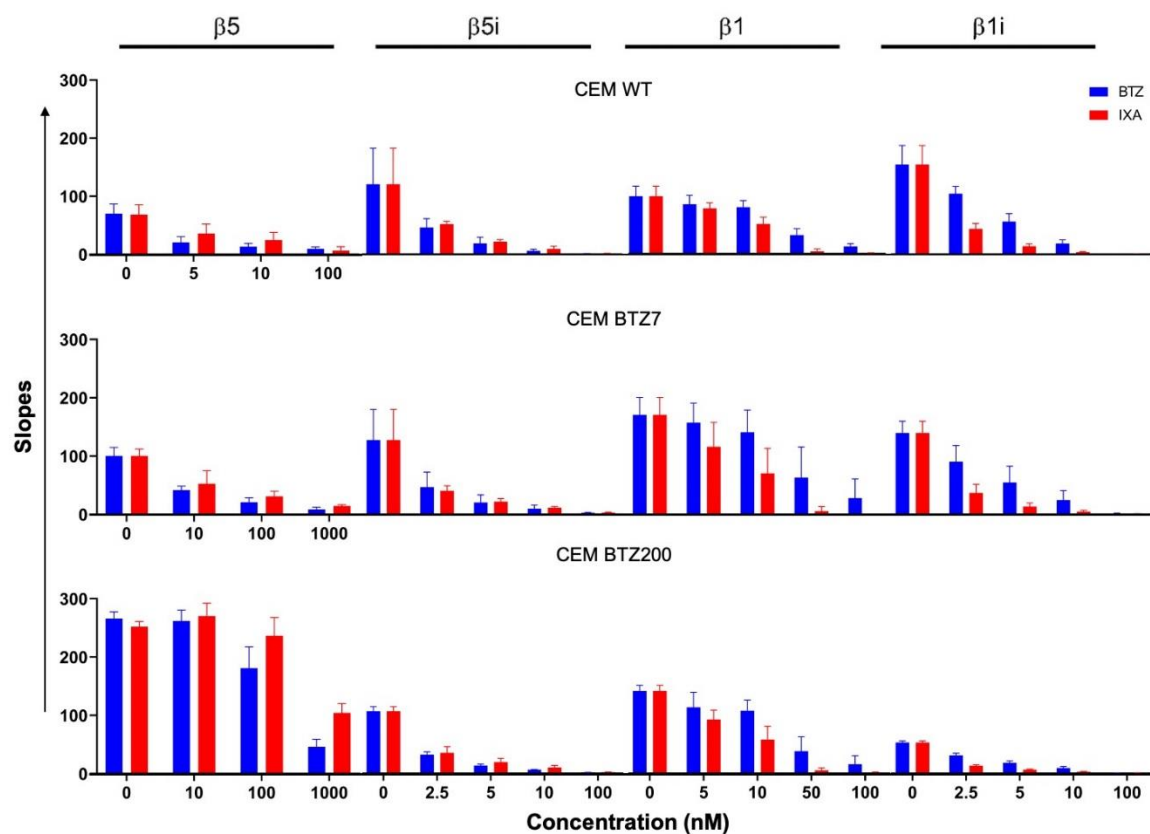

**TABLE S1: Patients' characteristics**

|                                          | ALL              | AML              |
|------------------------------------------|------------------|------------------|
| <b>Age, yrs mean <math>\pm</math> SD</b> | 5.8 $\pm$ 4.4    | 5.7 $\pm$ 5.5    |
| <b>Female</b>                            | 8                | 4                |
| <b>Male</b>                              | 7                | 5                |
| <b>Blast %</b>                           | 94 (range 86-98) | 79 (range 30-93) |
| <b>Subtype</b>                           |                  |                  |
| <b>B-cell</b>                            | 8                |                  |
| <b>T-cell</b>                            | 4                |                  |
| <b>Unknown</b>                           | 3                | 1                |
| <b>FAB M1</b>                            |                  | 1                |
| <b>FAB M2</b>                            |                  | 3                |
| <b>FAB M3</b>                            |                  | -                |
| <b>FAB M4</b>                            |                  | -                |
| <b>FAB M5</b>                            |                  | 4                |
| <b>FAB M6</b>                            |                  | -                |

**Table S2. Growth inhibitory effects of single drug IXA, DEX, and Ara-C and their concentration ranges used for the combination experiments.**

|                    | IC50<br>IXA     | Concentration<br>range IXA | IC50<br>DEX     | Concentration<br>range DEX | IC50<br>Ara-C   | Concentration<br>range Ara-C |
|--------------------|-----------------|----------------------------|-----------------|----------------------------|-----------------|------------------------------|
| <i>T-ALL cells</i> |                 |                            |                 |                            |                 |                              |
| CEM/WT             | 0.018 $\pm$ 0.0 | 3.05E-05 – 0.0625          | 0.016 $\pm$ 0.0 | 3.05E-05 – 0.0625          | -               | -                            |
| CEM/BTZ7           | 0.115 $\pm$ 0.4 | 0.0005 – 1.000             | 0.011 $\pm$ 0.0 | 3.05E-05 – 0.0625          | -               | -                            |
| CEM/BTZ200         | 2.261 $\pm$ 1.1 | 0.008 – 16.000             | 0.011 $\pm$ 0.0 | 3.05E-05 – 0.0625          | -               | -                            |
| <i>AML cells</i>   |                 |                            |                 |                            |                 |                              |
| THP-1/WT           | 0.018 $\pm$ 0.0 | 3.05E-05 – 0.0625          | -               | -                          | 1.457 $\pm$ 0.5 | 0.005 – 10.000               |
| THP-1/BTZ7         | 0.538 $\pm$ 0.1 | 0.0005 – 1.000             | -               | -                          | 0.945 $\pm$ 0.3 | 0.005 – 10.000               |
| THP-1/BTZ200       | 4.787 $\pm$ 1.2 | 0.008 – 16.000             | -               | -                          | 0.380 $\pm$ 0.1 | 0.001 – 2.500                |

Results are expressed as cell growth relative to control cells incubated without drug, set at 100%. Mean  $\pm$  SD (in  $\mu$ M) of three separate experiments performed in triplicate. Concentration ranges depict the lowest and highest concentrations of total 12 concentrations ( $\mu$ M)
